# Supplementary material for: Disentangling and modeling interactions in fish with burst-and-coast swimming reveal distinct alignment and attraction behaviors
Source: PubMed Central journal article supplement (PMC5783427; doi:10.1371/journal.pcbi.1005933), 2018-01-11
Supplement: pcbi.1005933.s001.pdf [file pcbi.1005933.s001.pdf]

## Supporting information

**S1 Table. List of experiments.**

| Number of fish | Tank Size (mm) | Date       | Proportion of active swimming | Duration (min) | Number of kicks |       |
|----------------|----------------|------------|-------------------------------|----------------|-----------------|-------|
| 1              | 176            | 2014-08-20 | 0.8                           | 191            | 21012           |       |
|                |                | 2014-08-20 | 0.1                           | 193            | 2572            |       |
|                |                | 2014-08-21 | 0.4                           | 187            | 10122           |       |
|                |                | 2014-08-21 | 0.7                           | 197            | 19849           |       |
|                |                | 2014-08-22 | 0.7                           | 204            | 15691           |       |
|                |                | 2014-08-22 | 0.1                           | 202            | 2401            |       |
|                |                | 2014-08-26 | 0.9                           | 230            | 31603           |       |
|                |                | 2014-08-26 | 0.1                           | 208            | 1550            |       |
|                |                | 2015-07-18 | 0.0                           | 188            | 631             |       |
|                |                | 2015-07-21 | 0.2                           | 178            | 4459            |       |
|                |                | 2015-07-25 | 0.5                           | 185            | 11772           |       |
|                | 250            | 2014-04-25 | 0.1                           | 186            | 3199            |       |
|                |                | 2014-04-25 | 0.3                           | 191            | 6112            |       |
|                |                | 2014-04-29 | 0.3                           | 195            | 6363            |       |
|                |                | 2014-04-29 | 0.2                           | 222            | 5955            |       |
|                |                | 2014-04-30 | 0.5                           | 187            | 13632           |       |
|                |                | 2014-05-06 | 0.3                           | 181            | 6760            |       |
|                |                | 2014-05-06 | 0.1                           | 191            | 2206            |       |
|                |                | 2014-05-07 | 0.5                           | 187            | 12127           |       |
|                |                | 2015-06-10 | 0.6                           | 190            | 10584           |       |
|                |                | 2015-07-19 | 0.5                           | 185            | 11531           |       |
|                |                | 2015-07-28 | 0.2                           | 204            | 3833            |       |
|                |                | 2015-07-31 | 0.3                           | 198            | 7179            |       |
|                |                | 353        | 2014-05-12                    | 0.5            | 205             | 13180 |
|                | 2014-05-13     |            | 0.7                           | 207            | 16325           |       |
|                | 2014-05-13     |            | 0.4                           | 192            | 11362           |       |
|                | 2014-05-28     |            | 0.2                           | 197            | 4468            |       |
|                | 2015-07-23     |            | 0.2                           | 187            | 6501            |       |
|                | 2015-07-26     |            | 0.3                           | 189            | 6357            |       |
|                | 2015-07-29     |            | 0.8                           | 202            | 21944           |       |
|                | 2015-07-30     |            | 0.9                           | 209            | 23604           |       |
|                | 2              | 250        | 2013-01-31                    | 0.9            | 65              | 13605 |
|                |                |            | 2013-02-04                    | 0.9            | 65              | 14473 |
| 2013-02-13     |                |            | 1.0                           | 41             | 9037            |       |
| 2013-03-04     |                |            | 0.9                           | 68             | 13663           |       |
| 2013-03-14     |                |            | 0.0                           | 86             | 1151            |       |
| 2013-03-18     |                |            | 0.9                           | 61             | 12401           |       |
| 2013-03-27     |                |            | 0.9                           | 63             | 14331           |       |
| 2014-02-14     |                |            | 1.0                           | 62             | 13365           |       |
| 2014-03-11     |                |            | 1.0                           | 61             | 15012           |       |
| 2014-11-04     |                |            | 0.9                           | 80             | 15287           |       |
| 2014-11-05     |                |            | 0.3                           | 77             | 6136            |       |
| 2014-11-05     |                |            | 0.7                           | 79             | 11910           |       |
| 2014-11-05     |                |            | 0.5                           | 75             | 8458            |       |
| 2014-11-06     |                |            | 0.5                           | 75             | 9262            |       |
| 2014-11-06     |                |            | 0.8                           | 78             | 14732           |       |
| 2014-11-07     |                |            | 0.7                           | 81             | 12904           |       |
